# Supplementary material
Source: PubMed Central journal article supplement (PMC5462548)
Supplement: NIHMS858612-supplement-Supplemental_Material.pdf [file NIHMS858612-supplement-Supplemental_Material.pdf]

### SDS-Urea Soluble ECM proteins

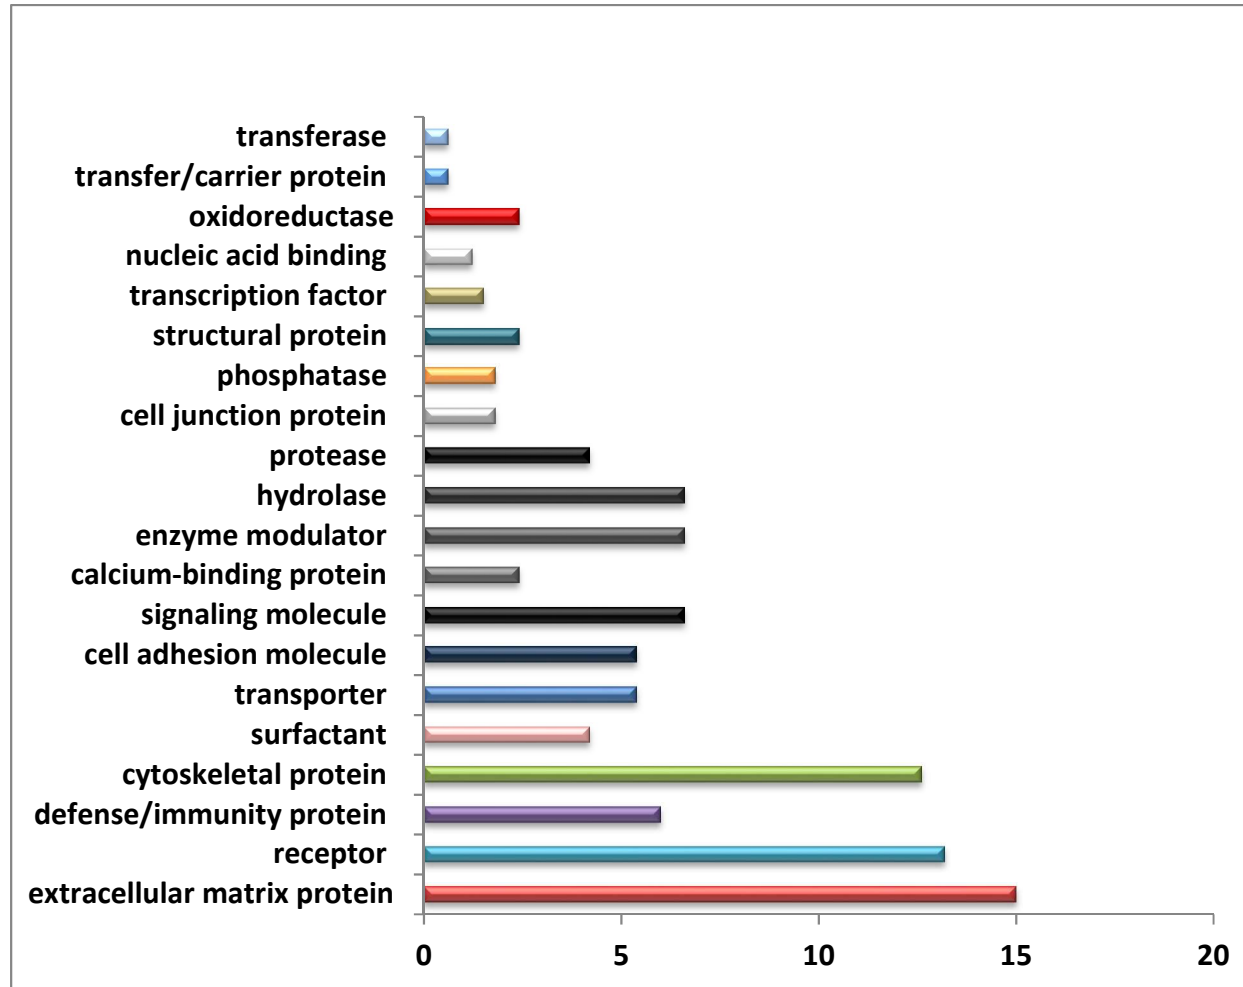

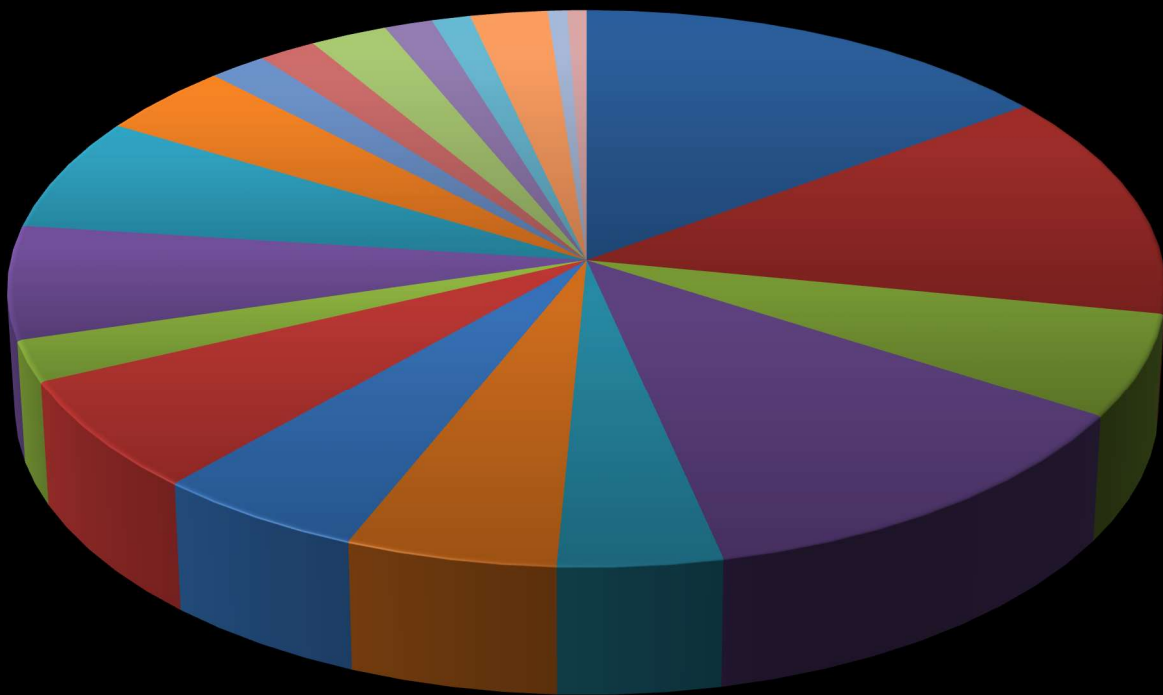

- extracellular matrix protein
- receptor
- defense/immunity protein
- cytoskeletal protein
- surfactant
- transporter
- cell adhesion molecule
- signaling molecule
- calcium-binding protein
- enzyme modulator
- hydrolase
- protease
- cell junction protein
- phosphatase
- structural protein
- transcription factor
- nucleic acid binding
- oxidoreductase
- transfer/carrier protein
- transferase

**SDS-Urea In-Soluble ECM proteins**

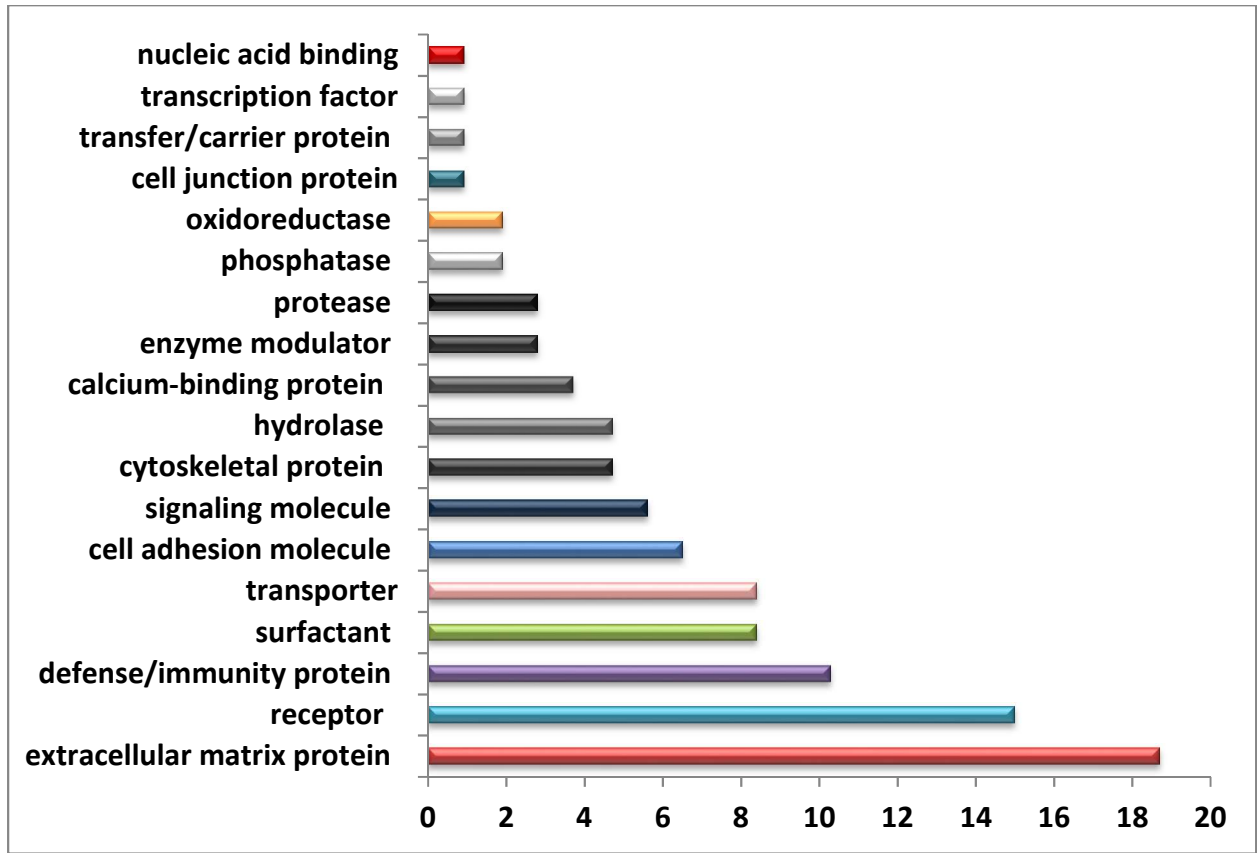

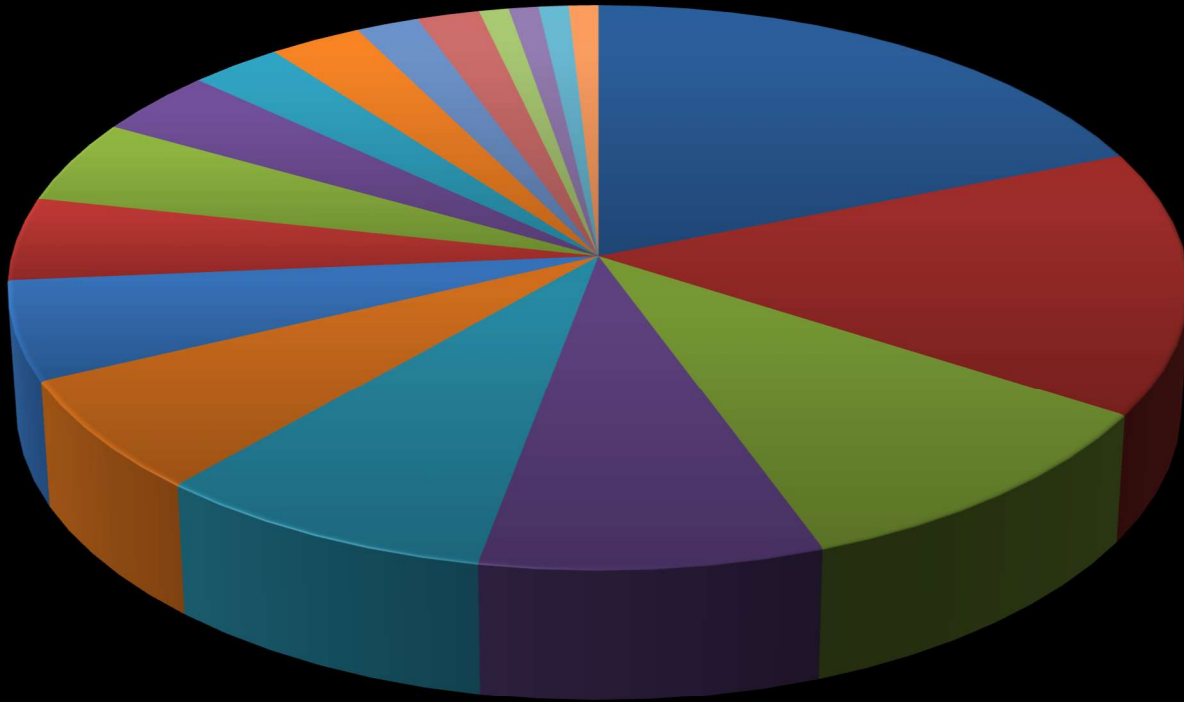

- extracellular matrix protein
- receptor
- defense/immunity protein
- surfactant
- transporter
- cell adhesion molecule
- signaling molecule
- cytoskeletal protein
- hydrolase
- calcium-binding protein
- enzyme modulator
- protease
- phosphatase
- oxidoreductase
- cell junction protein
- transfer/carrier protein
- transcription factor
- nucleic acid binding

**Fig 1S. Gene Ontology based on Panther protein category of the ECM proteins secreted by the human TM cells, identified by the LC-MS-MS analysis. Data are presented in both histogram format and Venn diagram format for the proteins identified in the ECM protein fraction (SDS-Urea soluble and SDS-Urea insoluble) based on mass spectrometry.**

**Table 1S: Proteins identified in the SDS-Urea soluble ECM protein fraction of the human TM cells by LC-MS-MS analysis.**

| <b>UniProtKB<br/>Accession Number</b> | <b>ECM proteins</b>                                                  | <b>Mol Weight</b> | <b>Peptide Count</b> |
|---------------------------------------|----------------------------------------------------------------------|-------------------|----------------------|
| H0Y5A9                                | Basement membrane-specific heparan sulfate proteoglycan core protein | 469 kDa           | 49                   |
| H0Y7Z1                                | Fibronectin                                                          | 263 kDa           | 41                   |
| P21333                                | Filamin-A                                                            | 281 kDa           | 24                   |
| P39060                                | Collagen alpha-1(XVIII) chain                                        | 178 kDa           | 19                   |
| P08670                                | Vimentin                                                             | 54 kDa            | 16                   |
| P02545                                | Prelamin-A/C                                                         | 74 kDa            | 16                   |
| Q96RW7                                | Hemicentin-1                                                         | 613 kDa           | 15                   |
| P12111                                | Collagen alpha-3(VI) chain                                           | 344 kDa           | 15                   |
| P39060                                | Collagen alpha-1(XVIII) chain                                        | 178 kDa           | 15                   |
| Q9Y6C2                                | EMILIN-1                                                             | 107 kDa           | 13                   |
| P63261                                | Actin, cytoplasmic 2                                                 | 42 kDa            | 13                   |
| P08493                                | Matrix Gla protein                                                   | 12 kDa            | 12                   |
| P35579                                | Myosin-9                                                             | 227 kDa           | 11                   |
| P62736                                | Actin, aortic smooth muscle                                          | 42 kDa            | 11                   |
| P35555                                | Fibrillin-1                                                          | 312 kDa           | 11                   |
| P10909                                | Clusterin                                                            | 52 kDa            | 11                   |
| Q92743                                | Serine protease HTRA1                                                | 51 kDa            | 10                   |
| Q8CG19                                | Latent-transforming growth factor beta-binding protein 2             | 195 kDa           | 9                    |
| Q05682                                | Caldesmon                                                            | 93 kDa            | 7                    |
| P48307                                | Tissue factor pathway inhibitor 2                                    | 27 kDa            | 5                    |
| Q99988                                | Growth/differentiation factor 15                                     | 34 kDa            | 5                    |
| Q12805                                | EGF-containing fibulin-like extracellular matrix protein 1           | 55 kDa            | 5                    |
| P14543                                | Nidogen-1                                                            | 136 kDa           | 5                    |

|        |                                                                  |         |   |
|--------|------------------------------------------------------------------|---------|---|
| P05556 | Integrin beta-1                                                  | 88 kDa  | 5 |
| P60709 | Actin, cytoplasmic 1                                             | 42 kDa  | 5 |
| P21980 | Protein-glutamine gamma-glutamyltransferase 2                    | 77 kDa  | 4 |
| O15230 | Laminin subunit alpha-5                                          | 400 kDa | 4 |
| Q06830 | Peroxiredoxin-1                                                  | 22 kDa  | 3 |
| P39060 | Collagen alpha-2(IV) chain                                       | 168 kDa | 3 |
| Q08397 | Lysyl oxidase homolog 1                                          | 63 kDa  | 3 |
| P11047 | Laminin subunit gamma-1                                          | 178 kDa | 3 |
| Q9GZM7 | Tubulointerstitial nephritis antigen-like                        | 52 kDa  | 3 |
| P07355 | Annexin A2                                                       | 39 kDa  | 3 |
| Q07065 | Cytoskeleton-associated protein 4                                | 66 kDa  | 3 |
| P12110 | Collagen alpha-2(VI) chain                                       | 109 kDa | 3 |
| P23246 | Splicing factor, proline- and glutamine-rich                     | 76 kDa  | 3 |
| Q14112 | Nidogen-2                                                        | 151 kDa | 3 |
| P35580 | Myosin-10                                                        | 229 kDa | 3 |
| Q9UH18 | A disintegrin and metalloproteinase with thrombospondin motifs 1 | 105kDa  | 3 |
| Q6ZMP0 | Thrombospondin type-1 domain-containing protein 4                | 112 kDa | 3 |
| O00622 | Protein CYR61                                                    | 42 kDa  | 3 |
| P06756 | Integrin alpha-V                                                 | 116 kDa | 3 |
| Q5VTE0 | Elongation factor 1-alpha 1                                      | 50 kDa  | 2 |
| P08123 | Collagen alpha-2(I) chain                                        | 129 kDa | 2 |
| P23142 | Fibulin-1                                                        | 77 kDa  | 2 |
| P02765 | Alpha-2-HS-glycoprotein                                          | 39 kDa  | 2 |
| Q71U36 | Tubulin alpha-1A chain                                           | 50 kDa  | 2 |
| P14618 | Pyruvate kinase PKM                                              | 58 kDa  | 2 |
| P27816 | Microtubule-associated protein 4                                 | 121 kDa | 2 |
| P20700 | Lamin-B1                                                         | 66 kDa  | 2 |

|        |                                                                  |         |   |
|--------|------------------------------------------------------------------|---------|---|
| P02452 | Collagen alpha-1(I) chain                                        | 139 kDa | 2 |
| Q9UH18 | A disintegrin and metalloproteinase with thrombospondin motifs 1 | 105 kDa | 2 |
| O00159 | Unconventional myosin-Ic                                         | 122 kDa | 2 |
| P24821 | Tenascin                                                         | 241 kDa | 2 |
| Q14254 | Flotillin-2                                                      | 47 kDa  | 2 |
| P12236 | ADP/ATP translocase 3                                            | 33 kDa  | 2 |
| Q66K79 | Carboxypeptidase Z                                               | 74 kDa  | 2 |
| O43854 | EGF-like repeat and discoidin I-like domain-containing protein 3 | 54 kDa  | 2 |
| P24593 | Insulin-like growth factor-binding protein 5                     | 31 kDa  | 2 |
| Q15436 | Protein transport protein Sec23A                                 | 86 kDa  | 2 |
| P51911 | Calponin-1                                                       | 33 kDa  | 2 |
| Q15417 | Calponin-3                                                       | 36 kDa  | 2 |
| P04083 | Annexin A1                                                       | 39 kDa  | 2 |
| O00468 | Agrin                                                            | 217 kDa | 2 |
| Q12802 | A-kinase anchor protein 13                                       | 308 kDa | 2 |
| P02461 | Collagen alpha-1(III) chain                                      | 139 kDa | 2 |
| Q96S97 | Myeloid-associated differentiation marker                        | 35 kDa  | 2 |
| O94804 | Serine/threonine-protein kinase 10                               | 112 kDa | 2 |
| Q9H772 | Gremlin-2                                                        | 19 kDa  | 2 |
| P41221 | Protein Wnt-5a                                                   | 42 kDa  | 2 |
| P07437 | Tubulin beta chain                                               | 50 kDa  | 2 |
| Q53TN4 | Cytochrome b reductase 1                                         | 32 kDa  | 2 |
| P48741 | Putative heat shock 70 kDa protein 7                             | 40 kDa  | 2 |
| P12109 | Collagen alpha-1(VI) chain                                       | 109 kDa | 2 |
| Q15149 | Plectin                                                          | 532 kDa | 2 |
| Q8N6G6 | ADAMTS-like protein 1                                            | 193 kDa | 2 |
| Q8WX93 | Palladin                                                         | 151 kDa | 2 |



|        |                                                        |         |   |
|--------|--------------------------------------------------------|---------|---|
| Q8WUJ3 | Cell migration-inducing and hyaluronan-binding protein | 153 kDa | 2 |
| P15502 | Elastin                                                | 68 kDa  | 2 |
| P27105 | Erythrocyte band 7 integral membrane protein           | 32 kDa  | 2 |
| Q16181 | Septin-7                                               | 51 kDa  | 2 |
| P07942 | Laminin subunit beta-1                                 | 198 kDa | 2 |
| P21741 | Midkine                                                | 16 kDa  | 2 |
| P06396 | Gelsolin                                               | 86 kDa  | 2 |
| Q09666 | Neuroblast differentiation-associated protein AHNAK    | 629 kDa | 2 |
| Q0ZGT2 | Nexilin                                                | 81 kDa  | 2 |
| P06733 | Alpha-enolase                                          | 47 kDa  | 2 |
| P21810 | Biglycan                                               | 42 kDa  | 2 |
| O75610 | Left-right determination factor 1                      | 41 kDa  | 2 |
| Q99623 | Prohibitin-2                                           | 33 kDa  | 2 |
| Q14011 | Cold-inducible RNA-binding protein                     | 19 kDa  | 2 |
| P52926 | High mobility group protein HMGI-C                     | 12 kDa  | 2 |
| Q562R1 | Beta-actin-like protein 2                              | 42 kDa  | 2 |
| Q12931 | Heat shock protein 75 kDa, mitochondrial               | 80 kDa  | 2 |
| P29401 | Transketolase                                          | 68 kDa  | 2 |
| Q15582 | Transforming growth factor-beta-induced protein ig-h3  | 75 kDa  | 2 |
| Q9Y490 | Talin-1                                                | 270 kDa | 2 |

**Table 2S: Proteins identified in the SDS-Urea Insoluble ECM protein fraction of the human TM cells by LC-MS-MS analysis.**

| <b>UniProtKB<br/>Accession Number</b> | <b>ECM proteins</b>                                                     | <b>Mol WT</b> | <b>Peptide count</b> |
|---------------------------------------|-------------------------------------------------------------------------|---------------|----------------------|
| H0Y7Z1                                | Fibronectin                                                             | 263 kDa       | 106                  |
| Q5SZJ2                                | Basement membrane-specific heparan sulfate<br>proteoglycan core protein | 469 kDa       | 56                   |
| P35555                                | Fibrillin-1                                                             | 312 kDa       | 28                   |
| Q9Y6C2                                | EMILIN-1                                                                | 107 kDa       | 26                   |
| Q96RW7                                | Hemicentin-1                                                            | 613 kDa       | 13                   |
| P08572                                | Collagen alpha-2(IV) chain                                              | 168 kDa       | 13                   |
| Q8CG19                                | Latent-transforming growth factor beta-binding protein 1                | 187 kDa       | 10                   |
| O15230                                | Laminin subunit alpha-5                                                 | 400 kDa       | 9                    |
| P02452                                | Collagen alpha-1(I) chain                                               | 139 kDa       | 8                    |
| P62736                                | Actin, aortic smooth muscle                                             | 42 kDa        | 8                    |
| P35556-2                              | Fibrillin-2                                                             | 315 kDa       | 7                    |
| Q8N6G6                                | ADAMTS-like protein 1                                                   | 193 kDa       | 7                    |
| Q6ZMP0                                | Thrombospondin type-1 domain-containing protein 4                       | 112 kDa       | 6                    |
| P02462                                | Collagen alpha-1(IV) chain                                              | 161 kDa       | 6                    |
| Q05682                                | Caldesmon                                                               | 93 kDa        | 6                    |
| Q8WX93                                | Palladin                                                                | 151 kDa       | 6                    |
| Q8WUJ3                                | Cell migration-inducing and hyaluronan-binding protein                  | 153 kDa       | 6                    |
| Q14767                                | Latent-transforming growth factor beta-binding protein 2                | 195 kDa       | 5                    |
| Q06830                                | Peroxiredoxin-1                                                         | 22 kDa        | 5                    |
| P11047                                | Laminin subunit gamma-1                                                 | 178 kDa       | 5                    |
| P21980                                | Protein-glutamine gamma-glutamyltransferase 2                           | 77 kDa        | 4                    |
| P08123                                | Collagen alpha-2(I) chain                                               | 129 kDa       | 4                    |
| P39060                                | Collagen alpha-1(XVIII) chain                                           | 178 kDa       | 3                    |

|        |                               |         |   |
|--------|-------------------------------|---------|---|
| P01966 | Hemoglobin subunit alpha      | 15 kDa  | 3 |
| P39060 | Collagen alpha-1(XVIII) chain | 178 kDa | 3 |
| Q96HC4 | PDZ and LIM domain protein 5  | 64 kDa  | 3 |
| P24821 | Tenascin                      | 241 kDa | 3 |
| P15502 | Elastin                       | 68 kDa  | 3 |
| P05997 | Collagen alpha-2(V) chain     | 145 kDa | 3 |
| P27658 | Collagen alpha-1(VIII) chain  | 73 kDa  | 2 |
| P63261 | Actin, cytoplasmic 2          | 42 kDa  | 2 |
| P02461 | Collagen alpha-1(III) chain   | 139 kDa | 2 |
| P07942 | Laminin subunit beta-1        | 198 kDa | 2 |
| O00159 | Unconventional myosin-Ic      | 122 kDa | 2 |
| P02769 | Collagen alpha-2(VIII) chain  | 67 kDa  | 2 |
| Q08397 | Lysyl oxidase homolog 1       | 63 kDa  | 2 |
